# Supplementary material for: Determination and characterization of molecular heterogeneity and precision medicine strategies of patients with pancreatic cancer and pancreatic neuroendocrine tumor based on oxidative stress and mitochondrial dysfunction-related genes
Source: PubMed Central journal article supplement (PMC10200886; doi:10.3389/fendo.2023.1127441), 2023-05-08

S1

S2

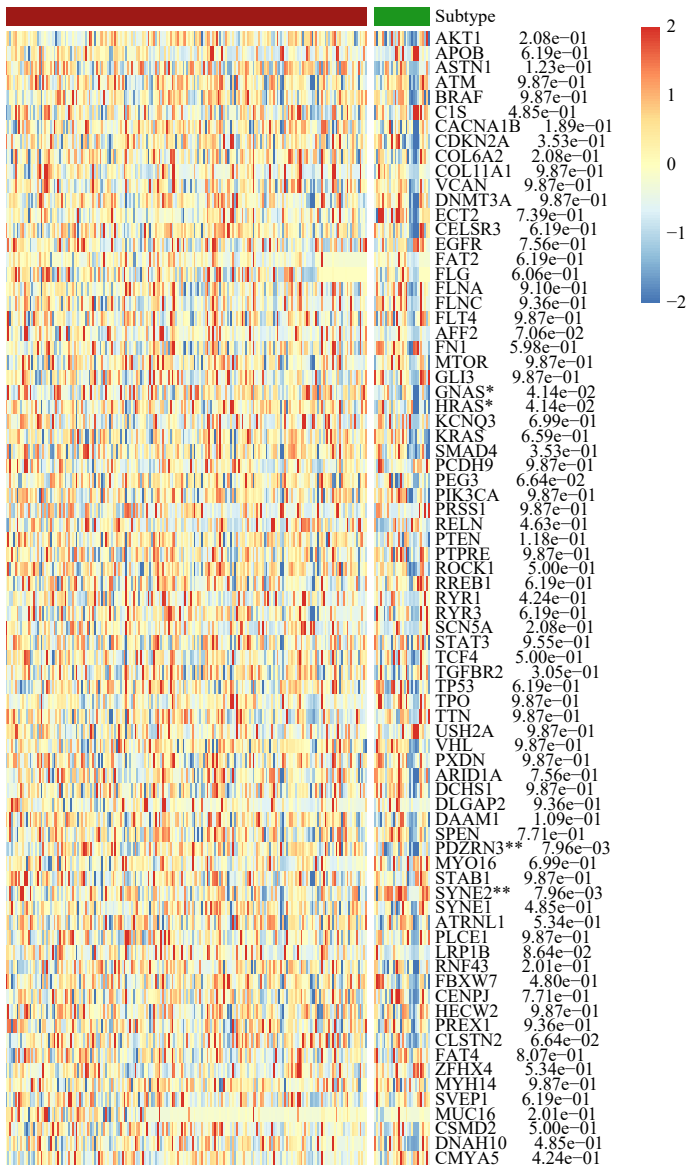

Supplement: Image_4.pdf [file Image_4.pdf]
